# Supplementary material for: Crystalline amidocerium(iv) oxides and a side-on bridging dioxygen complex
Source: Royal Society of Chemistry journal article supplement (doi:10.1039/c0dt00349b), 2010-01-01
Supplement: c0dt00349b.pdf [file c0dt00349b.pdf]

## Crystalline Amidocerium(IV) Oxides and a Side-on Bridging Dioxygen Complex

Peter B. Hitchcock, Alexei V. Khvostov, Michael F. Lappert\*, Zhengning Li, Andrey V. Protchenko

*Department of Chemistry and Biochemistry, University of Sussex, Brighton, BN1 9QJ, U.K. Fax: 44*

### Supplementary Information:

The Raman spectra of solid compounds [ $\{\text{Ce}(\text{NR}_2)_3\}_2(\mu\text{-}\eta^2\text{:}\eta^2\text{-O}_2)\cdot 2\text{C}_6\text{H}_{14}$  (**9**) and  $[\text{Ce}(\text{NR}_2)_3]$  (**1**) (R = SiMe<sub>3</sub>)

---

\* E-mail: [m.f.lappert@sussex.ac.uk](mailto:m.f.lappert@sussex.ac.uk); Tel.: +44 1273 678316; Fax: +44 1273 876687

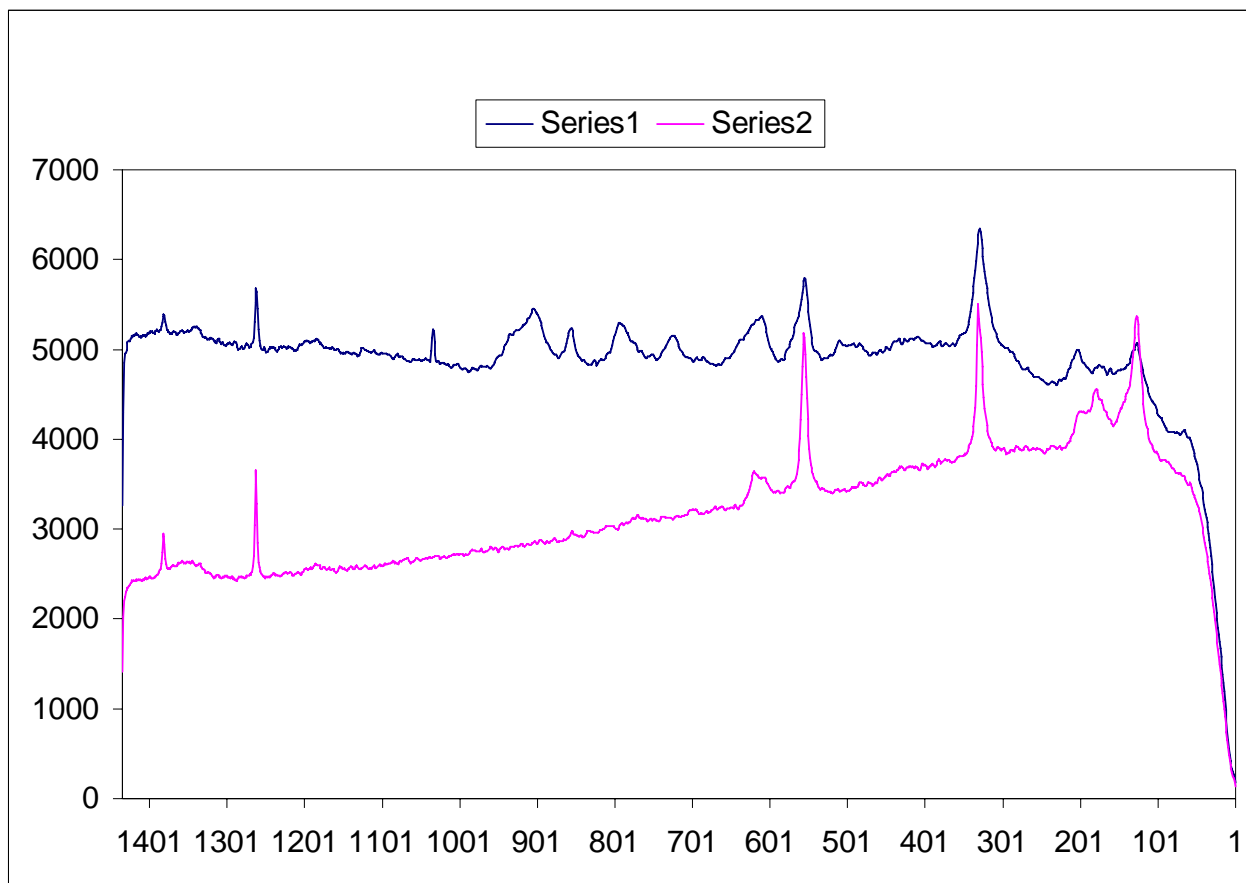

**Fig. 1S** The resonance Raman spectra of the solid compounds  $[\{\text{Ce}(\text{NR}_2)_3\}_2(\mu\text{-}\eta^2\text{:}\eta^2\text{-O}_2)]\cdot 2\text{C}_6\text{H}_{14}$  (**9**) (Series 1) and  $[\text{Ce}(\text{NR}_2)_3]$  (**1**) (Series 2) ( $\text{R} = \text{SiMe}_3$ )
